# Supplementary material for: Large genetic yield potential and genetic yield gap estimated for wheat in Europe
Source: PubMed Central journal article supplement (PMC7063691; doi:10.1016/j.gfs.2019.100340), 2020-03
Supplement: mmc1.pdf [file mmc1.pdf]

# **Large genetic yield potential and genetic yield gap estimated for wheat in Europe**

## **Supplementary Information**

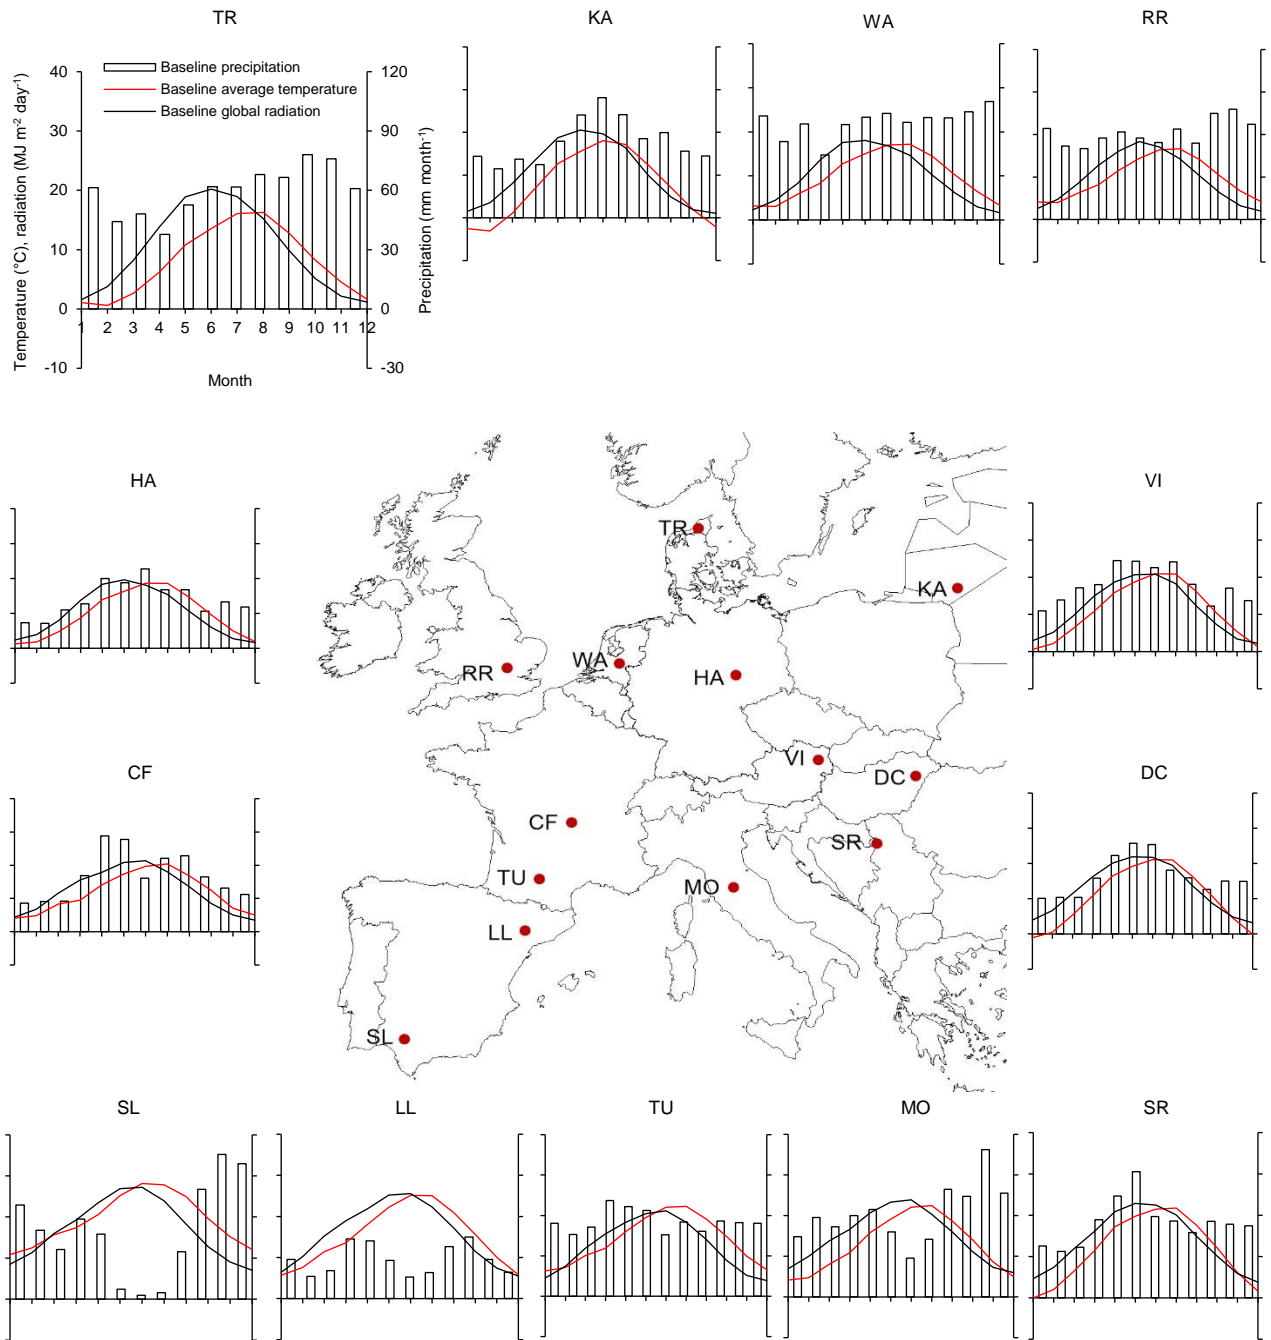

**Supplementary Fig. S1.** Locations of 13 selected study sites, representing major wheat growing regions across Europe. The current climate viz. average air temperature, mean monthly precipitation and mean daily global solar radiation.

Heat stress index (HSI95)

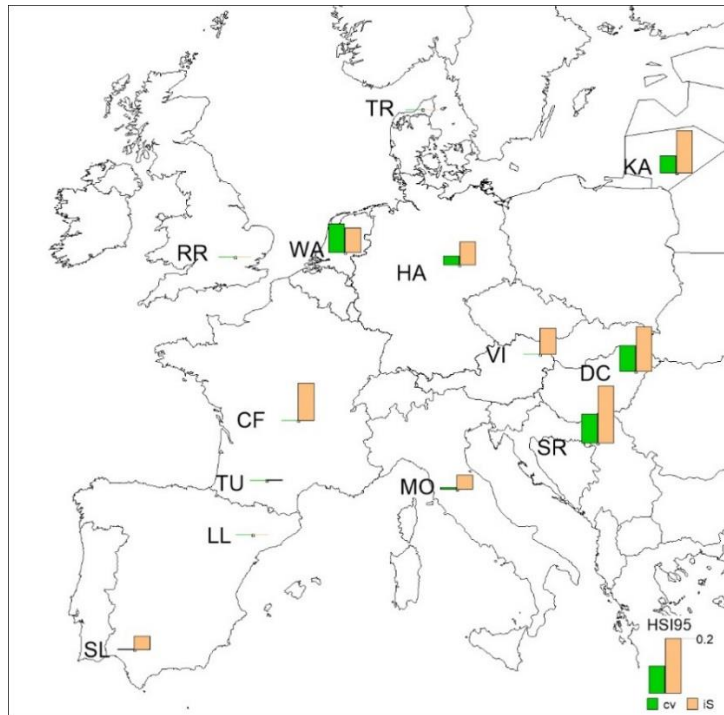

Drought stress index (DSI95)

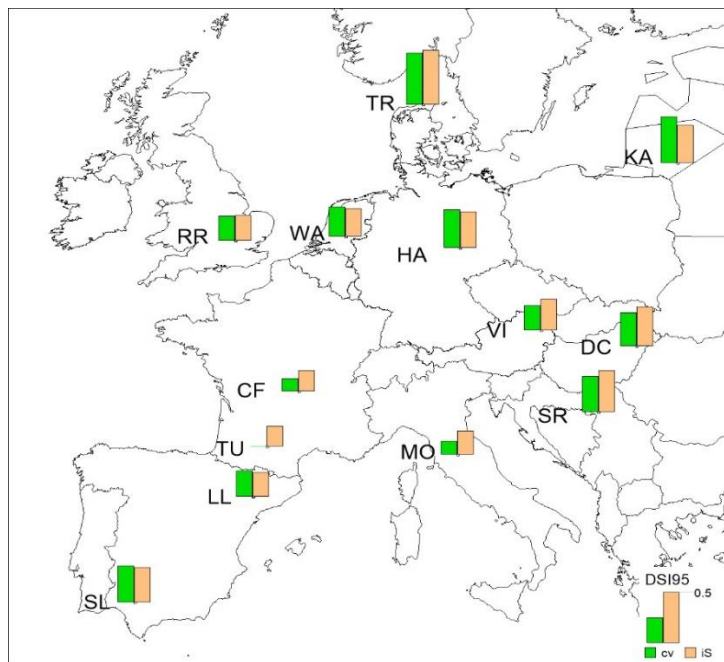

**Supplementary Fig. S2.** 95-percentile of heat stress index (HSI95) and 95-percentile of drought stress index (DSI95) of local wheat cultivars (cv, green) in rainfed condition under current climate and optimal management at study sites across Europe, and heat and drought sensitive around flowering wheat ideotypes (iS, orange) optimised to achieve high yield potentials.  $HSI = (1 - Y_{wh}/Y_w)$ ,  $DSI = (1 - Y_{wd}/Y_w)$ , where  $Y_w$  is water limited yield,  $Y_{wh}$  is water limited yield of wheat sensitive to heat stress around flowering, and  $Y_{wd}$  is water limited yield of wheat sensitive to drought stress around flowering.

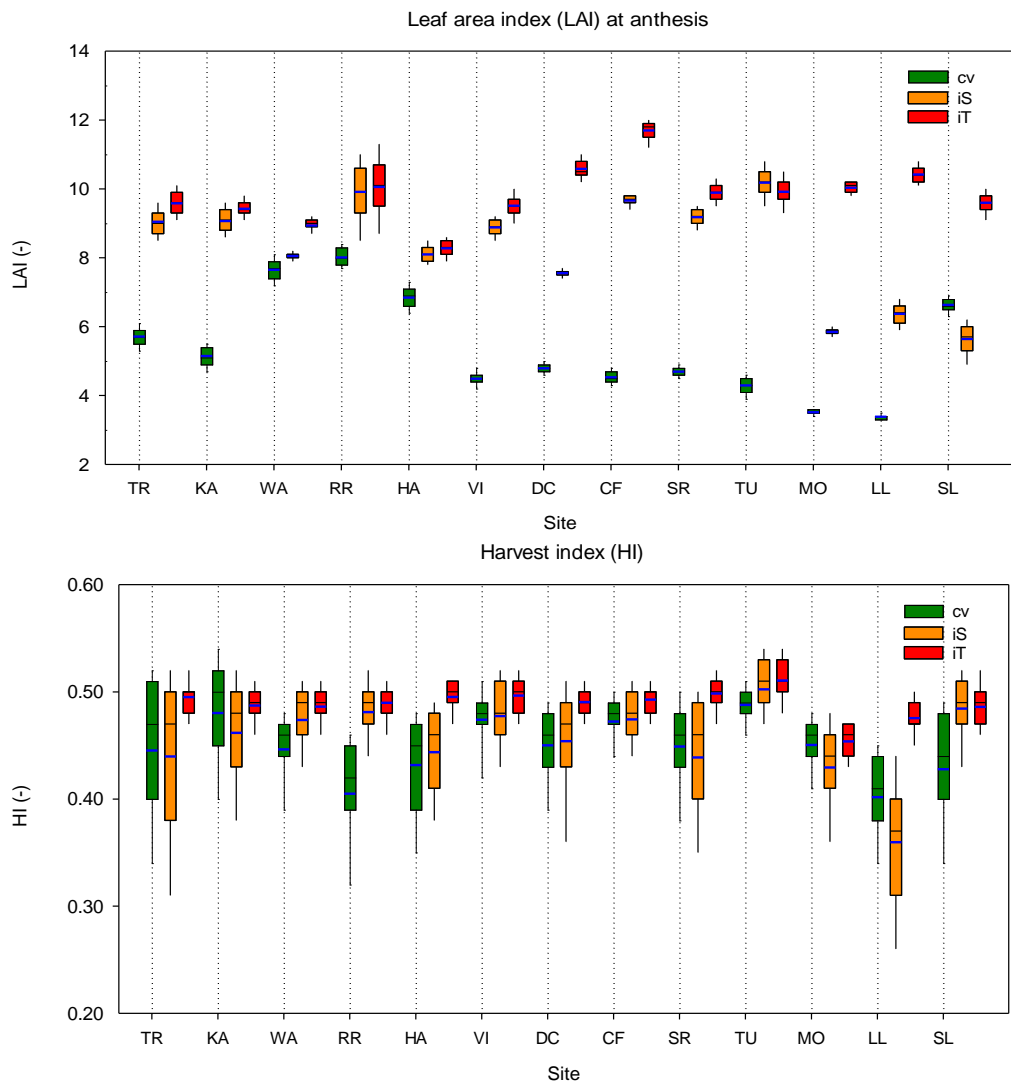

**Supplementary Fig. S3.** Simulated leaf area index (LAI) at anthesis and harvest index (HI) of local wheat cultivar (cv, green) in rainfed condition under current climate and optimal management at study sites across Europe, and wheat ideotypes designed as heat and drought sensitive (iS, orange) and tolerant (iT, red) around flowering to achieve high yield potentials.

**Supplementary Table S1.** Study sites across major wheat growing regions in Europe

| No | ID | Site             | Country     | Latitude<br>(°) | Longitude<br>(°) | Average<br>air<br>temperature<br>(°C) | Precipitation<br>(mm<br>yr <sup>-1</sup> ) | Radiation<br>(MJ m <sup>-2</sup><br>day <sup>-1</sup> ) | Local<br>wheat<br>cultivar<br>(cv) | Sowing<br>date of<br>local<br>wheat<br>cultivar |
|----|----|------------------|-------------|-----------------|------------------|---------------------------------------|--------------------------------------------|---------------------------------------------------------|------------------------------------|-------------------------------------------------|
| 1  | TR | Tylstrup         | Denmark     | 57.20           | 9.90             | 7.9                                   | 717                                        | 9.9                                                     | Avalon                             | 18-Oct                                          |
| 2  | KA | Kaunas           | Lithuania   | 54.88           | 23.83            | 7.1                                   | 644                                        | 10.0                                                    | Avalon                             | 25-Oct                                          |
| 3  | WA | Wageningen       | Netherlands | 51.97           | 5.67             | 9.7                                   | 801                                        | 9.7                                                     | Claire                             | 20-Oct                                          |
| 4  | RR | Rothamsted       | UK          | 51.80           | -0.35            | 9.7                                   | 735                                        | 9.7                                                     | Mercia                             | 10-Oct                                          |
| 5  | HA | Halle            | Germany     | 51.51           | 11.95            | 9.6                                   | 507                                        | 10.0                                                    | Claire                             | 20-Oct                                          |
| 6  | VI | Vienna           | Austria     | 48.23           | 16.35            | 10.8                                  | 651                                        | 11.4                                                    | Thesee                             | 20-Oct                                          |
| 7  | DC | Debrecen         | Hungary     | 47.60           | 21.60            | 10.4                                  | 591                                        | 12.7                                                    | Thesee                             | 18-Oct                                          |
| 8  | CF | Clermont-Ferrand | France      | 45.80           | 3.10             | 11.6                                  | 606                                        | 12.2                                                    | Thesee                             | 15-Nov                                          |
| 9  | SR | Sremska          | Serbia      | 45.00           | 19.51            | 11.5                                  | 654                                        | 13.4                                                    | Thesee                             | 15-Nov                                          |
| 10 | TU | Toulouse         | France      | 43.62           | 1.38             | 13.8                                  | 666                                        | 12.4                                                    | Thesee                             | 20-Nov                                          |
| 11 | MO | Montagnano       | Italy       | 43.30           | 11.80            | 12.8                                  | 738                                        | 14.7                                                    | Creso                              | 25-Nov                                          |
| 12 | LL | Lleida           | Spain       | 41.63           | 0.60             | 15.1                                  | 344                                        | 15.6                                                    | Creso                              | 25-Nov                                          |
| 13 | SL | Seville          | Spain       | 37.42           | -5.88            | 19.2                                  | 595                                        | 17.0                                                    | Cartaya                            | 30-Dec                                          |

**Supplementary Table S2.** Description of the cultivar parameters (traits) of the local current wheat cultivars (cv) at study sites across major wheat growing regions in Europe.

| No. | Parameters                                                      | Symbol         | Unit                                     | Value  |         |        |        |        |        |
|-----|-----------------------------------------------------------------|----------------|------------------------------------------|--------|---------|--------|--------|--------|--------|
|     |                                                                 |                |                                          | Avalon | Cartaya | Claire | Creso  | Mercia | Thesee |
| 1   | Phyllochron                                                     | $P_h$          | °C day                                   | 90.0   | 105.0   | 110.0  | 90.0   | 107.0  | 94.0   |
| 2   | Day length response                                             | $P_p$          | Leaf h <sup>-1</sup> day length          | 0.65   | 0.20    | 0.50   | 0.60   | 0.53   | 0.4    |
| 3   | Thermal time from sowing to emergence                           | $TT_{SOWEM}$   | °C day                                   | 150.0  | 150.0   | 150.0  | 160.0  | 150.0  | 175.0  |
| 4   | Thermal time from anthesis to beginning of grain fill           | $TT_{ANBGF}$   | °C day                                   | 50.0   | 100.0   | 100.0  | 100.0  | 160.0  | 100.0  |
| 5   | Thermal time from beginning of grain fill to end of grain fill  | $TT_{BGFEFF}$  | °C day                                   | 650.0  | 550.0   | 650.0  | 650.0  | 650.0  | 650.0  |
| 6   | Thermal time from end of grain fill to harvest maturity         | $TT_{EGFMAT}$  | °C day                                   | 200.0  | 200.0   | 200.0  | 200.0  | 200.0  | 200.0  |
| 7   | Maximum area of flag leaf                                       | $A_{Max}$      | m <sup>2</sup> leaf m <sup>-2</sup> soil | 0.0065 | 0.0065  | 0.007  | 0.003  | 0.0075 | 0.004  |
| 8   | Minimum possible leaf number                                    | $L_{Min}$      | -                                        | 8.55   | 8.50    | 8.0    | 8.50   | 8.0    | 8.0    |
| 9   | Absolute maximum leaf number                                    | $L_{Max}$      | -                                        | 24.0   | 24.0    | 18.0   | 24.0   | 24.0   | 18.0   |
| 10  | Response of vernalisation rate to temperature                   | $VAI$          | Day <sup>-1</sup> °C                     | 0.0012 | 0       | 0.0012 | 0.0015 | 0.0012 | 0.0012 |
| 11  | Vernalisation rate at 0°C                                       | $VBEE$         | Day <sup>-1</sup>                        | 0.015  | 0       | 0.012  | 0.012  | 0.011  | 0.012  |
| 12  | Heat stress grain number reduction threshold temperature        | $HSGNT$        | °C                                       | 30.0   | 30.0    | 30.0   | 30.0   | 30.0   | 30.0   |
| 13  | Heat stress grain number reduction rate                         | $HSGNR$        | °C <sup>-1</sup>                         | 0.04   | 0.04    | 0.04   | 0.04   | 0.04   | 0.04   |
| 14  | Drought stress grain number reduction stress threshold          | $DSGNT$        | -                                        | 0.90   | 0.90    | 0.90   | 0.90   | 0.90   | 0.90   |
| 15  | Drought stress grain number reduction stress saturation         | $DSGNS$        | -                                        | 0.30   | 0.30    | 0.30   | 0.30   | 0.30   | 0.30   |
| 16  | Maximum drought stress grain number reduction                   | $DSGNRM_{max}$ | -                                        | 0.20   | 0.20    | 0.20   | 0.20   | 0.20   | 0.20   |
| 17  | Maximum potential grain weight                                  | $MaxGW$        | g                                        | 0.045  | 0.045   | 0.045  | 0.045  | 0.045  | 0.045  |
| 18  | Grain number per g DM ear                                       | $GNEar$        | g <sup>-1</sup>                          | 100    | 100     | 100    | 100    | 100    | 100    |
| 19  | Stay green                                                      | $S_G$          | -                                        | 0.50   | 0.50    | 0.50   | 0.50   | 0.50   | 0.50   |
| 20  | Rate coefficient of root water uptake from the root bottom      | $R_u$          | -                                        | 0.03   | 0.03    | 0.03   | 0.03   | 0.03   | 0.03   |
| 21  | Maximum leaf senescence acceleration factor due to water stress | $W_{ss}$       | -                                        | 1.27   | 1.27    | 1.27   | 1.27   | 1.27   | 1.27   |

**Supplementary Table S3.** Cultivar parameters (traits) used for designing wheat ideotypes in rainfed condition under current climate and genetic variation observed in those parameters (traits).

| Parameters                                                      | Symbol    | Unit                                     | Range used in model optimization | Genetic variation        | Reference                                                      |
|-----------------------------------------------------------------|-----------|------------------------------------------|----------------------------------|--------------------------|----------------------------------------------------------------|
| <b>Canopy structure</b>                                         |           |                                          |                                  |                          |                                                                |
| Maximum area of flag leaf                                       | $A_{Max}$ | m <sup>2</sup> leaf m <sup>-2</sup> soil | 0.005–0.01                       | ≤40%                     | Fischer et al., 1998; Shearman et al., 2005                    |
| Stay green                                                      | $S_G$     | -                                        | 0.00–1.50                        |                          |                                                                |
| <b>Canopy Phenology</b>                                         |           |                                          |                                  |                          |                                                                |
| Phyllochron                                                     | $P_h$     | °C day                                   | 80.0–140.0                       | ≤20%                     | Ishag et al., 1998; Mosaad et al., 1995                        |
| Day length response                                             | $P_p$     | Leaf h <sup>-1</sup> day length          | 0.05–0.90                        | 9.74–107.40 <sup>†</sup> | Kosner and Zurkova, 1996                                       |
| Duration of grain filling                                       | $G_f$     | °C day                                   | 500–900                          | ≤40%                     | Akkaya et al., 2006; Charmet et al., 2005; Robert et al., 2001 |
| <b>Root water uptake</b>                                        |           |                                          |                                  |                          |                                                                |
| Rate coefficient of root water uptake from the root bottom      | $R_w$     | -                                        | 0.01–0.07                        | Large variation          | Asseng et al., 1998; Manschadi et al., 2006                    |
| <b>Drought tolerance</b>                                        |           |                                          |                                  |                          |                                                                |
| Maximum leaf senescence acceleration factor due to water stress | $W_{cs}$  | -                                        | 1.0–1.7                          |                          |                                                                |

<sup>†</sup>Varietal difference in number of days till heading under long- and short-day conditions found between 9.74 and 107.40 in a photoperiodic response experiment (Kosner & Zurkova 1996)<sup>5</sup>

## References

- Akkaya, A., Dokuyucu, T., Kara, R., Akçura, M., 2006. Harmonization ratio of post- to pre-anthesis durations by thermal times for durum wheat cultivars in a Mediterranean environment. *Eur. J. Agron.* 24, 404-408. <https://doi.org/10.1016/j.eja.2005.10.005>.
- Asseng, S., Ritchie, J.T., Smucker, A.J.M., Robertson, M.J., 1998. Root growth and water uptake during water deficit and recovering in wheat. *Plant Soil* 201, 265-273. <https://doi.org/10.1023/a:1004317523264>.
- Charmet, G., Robert, N., Branlard, G., Linossier, L., Martre, P., Tribouï, E., 2005. Genetic analysis of dry matter and nitrogen accumulation and protein composition in wheat kernels. *Theor. Appl. Genet.* 111, 540-550. <https://doi.org/10.1007/s00122-005-2045-1>.
- Fischer, R.A., Rees, D., Sayre, K.D., Lu, Z.M., Condon, A.G., Saavedra, A.L., 1998. Wheat yield progress associated with higher stomatal conductance and photosynthetic rate, and cooler canopies. *Crop Sci.* 38, 1467-1475. <https://doi.org/10.2135/cropsci1998.0011183X003800060011x>.
- Ishag, H.M., Mohamed, B.A., Ishag, K.H., 1998. Leaf development of spring wheat cultivars in an irrigated heat-stressed environment. *Field Crop Res.* 58, 167-175. [https://doi.org/10.1016/S0378-4290\(98\)00092-6](https://doi.org/10.1016/S0378-4290(98)00092-6).
- Kosner, J., Zurkova, D., 1996. Photoperiodic response and its relation to earliness in wheat. *Euphytica* 89, 59-64. <https://doi.org/10.1007/BF00015719>.
- Manschadi, A.M., Christopher, J., deVoil, P., Hammer, G.L., 2006. The role of root architectural traits in adaptation of wheat to water-limited environments. *Funct. Plant Biol.* 33, 823-837. <https://doi.org/10.1071/FP06055>.
- Mosaad, M.G., Ortizferrara, G., Mahalakshmi, V., Fischer, R.A., 1995. Phyllochron response to vernalization and photoperiod in spring wheat. *Crop Sci.* 35, 168-171. <https://doi.org/10.2135/cropsci1995.0011183X003500010031x>.
- Robert, N., Berard, P., Hennequet, C., 2001. Dry matter and nitrogen accumulation in wheat kernel. Genetic variation in rate and duration of grain filling [*Triticum aestivum* L.]. *J. Genet. Breed.* 55, 297-305.
- Shearman, V.J., Sylvester-Bradley, R., Scott, R.K., Foulkes, M.J., 2005. Physiological processes associated with wheat yield progress in the UK. *Crop Sci.* 45, 175-185. <https://doi.org/10.2135/cropsci2005.0175>.

**Supplementary Table S4.** Cultivar parameters (traits) of local current wheat cultivars (cv) at study sites across major wheat growing regions in Europe, and wheat ideotypes designed as heat and drought sensitive (iS) and tolerant (iT) around flowering to achieve high yield potentials in rainfed condition under current climate.

| Site                                                                                     | Cultivar/<br>ideotype | Cultivar parameter/trait                                  |                             |                                  |                                                              |                                  |                             |                              |
|------------------------------------------------------------------------------------------|-----------------------|-----------------------------------------------------------|-----------------------------|----------------------------------|--------------------------------------------------------------|----------------------------------|-----------------------------|------------------------------|
|                                                                                          |                       | <i>A</i><br>(m <sup>2</sup> leaf m <sup>-2</sup><br>soil) | <i>S<sub>G</sub></i><br>(-) | <i>P<sub>h</sub></i><br>(°C day) | <i>P<sub>p</sub></i><br>(Leaf h <sup>-1</sup> day<br>length) | <i>G<sub>f</sub></i><br>(°C day) | <i>R<sub>u</sub></i><br>(%) | <i>W<sub>ss</sub></i><br>(-) |
| Local current wheat cultivar (cv)                                                        |                       |                                                           |                             |                                  |                                                              |                                  |                             |                              |
| Tylstrup, Denmark (TR)                                                                   | Avalon                | 0.0065                                                    | 0.500                       | 90.0                             | 0.650                                                        | 650.0                            | 0.030                       | 1.270                        |
| Kaunas, Lithuania (KA)                                                                   | Avalon                | 0.0065                                                    | 0.500                       | 90.0                             | 0.650                                                        | 650.0                            | 0.030                       | 1.270                        |
| Wageningen, Netherlands (WA)                                                             | Claire                | 0.0070                                                    | 0.500                       | 110.0                            | 0.500                                                        | 650.0                            | 0.030                       | 1.270                        |
| Rothamsted, UK (RR)                                                                      | Mercia                | 0.0075                                                    | 0.500                       | 107.0                            | 0.530                                                        | 650.0                            | 0.030                       | 1.270                        |
| Halle Germany (HA)                                                                       | Claire                | 0.0070                                                    | 0.500                       | 110.0                            | 0.500                                                        | 650.0                            | 0.030                       | 1.270                        |
| Vienna, Austria (VI)                                                                     | Thesee                | 0.0040                                                    | 0.500                       | 94.0                             | 0.400                                                        | 650.0                            | 0.030                       | 1.270                        |
| Debrecen, Hungary (DC)                                                                   | Thesee                | 0.0040                                                    | 0.500                       | 94.0                             | 0.400                                                        | 650.0                            | 0.030                       | 1.270                        |
| Clermont-Ferrand, France (CF)                                                            | Thesee                | 0.0040                                                    | 0.500                       | 94.0                             | 0.400                                                        | 650.0                            | 0.030                       | 1.270                        |
| Sremska, Serbia (SR)                                                                     | Thesee                | 0.0040                                                    | 0.500                       | 94.0                             | 0.400                                                        | 650.0                            | 0.030                       | 1.270                        |
| Toulouse, France (TU)                                                                    | Thesee                | 0.0040                                                    | 0.500                       | 94.0                             | 0.400                                                        | 650.0                            | 0.030                       | 1.270                        |
| Montagnano, Italy (MO)                                                                   | Creso                 | 0.0030                                                    | 0.500                       | 90.0                             | 0.600                                                        | 650.0                            | 0.030                       | 1.270                        |
| Lleida, Spain (LL)                                                                       | Creso                 | 0.0030                                                    | 0.500                       | 90.0                             | 0.600                                                        | 650.0                            | 0.030                       | 1.270                        |
| Seville, Spain (SL)                                                                      | Cartaya               | 0.0065                                                    | 0.500                       | 105.0                            | 0.200                                                        | 550.0                            | 0.030                       | 1.270                        |
| Wheat ideotype optimised as sensitive to heat and drought stresses around flowering (iS) |                       |                                                           |                             |                                  |                                                              |                                  |                             |                              |
| Tylstrup, Denmark (TR)                                                                   | Ideotype              | 0.0081                                                    | 1.090                       | 138.9                            | 0.459                                                        | 816.1                            | 0.030                       | 1.330                        |
| Kaunas, Lithuania (KA)                                                                   | Ideotype              | 0.0100                                                    | 1.200                       | 129.6                            | 0.662                                                        | 895.4                            | 0.062                       | 1.291                        |
| Wageningen, Netherlands (WA)                                                             | Ideotype              | 0.0064                                                    | 0.860                       | 140.0                            | 0.072                                                        | 849.2                            | 0.055                       | 1.010                        |
| Rothamsted, UK (RR)                                                                      | Ideotype              | 0.0100                                                    | 1.210                       | 139.2                            | 0.050                                                        | 900.0                            | 0.067                       | 1.021                        |
| Halle Germany (HA)                                                                       | Ideotype              | 0.0075                                                    | 1.310                       | 127.5                            | 0.391                                                        | 680.2                            | 0.055                       | 1.173                        |
| Vienna, Austria (VI)                                                                     | Ideotype              | 0.0079                                                    | 0.610                       | 134.1                            | 0.133                                                        | 882.4                            | 0.062                       | 1.108                        |
| Debrecen, Hungary (DC)                                                                   | Ideotype              | 0.0060                                                    | 1.500                       | 131.1                            | 0.064                                                        | 900.0                            | 0.058                       | 1.125                        |
| Clermont-Ferrand, France (CF)                                                            | Ideotype              | 0.0078                                                    | 1.170                       | 138.4                            | 0.052                                                        | 897.8                            | 0.062                       | 1.228                        |
| Sremska, Serbia (SR)                                                                     | Ideotype              | 0.0081                                                    | 0.650                       | 139.5                            | 0.050                                                        | 900.0                            | 0.063                       | 1.164                        |
| Toulouse, France (TU)                                                                    | Ideotype              | 0.0100                                                    | 0.770                       | 130.3                            | 0.052                                                        | 900.0                            | 0.054                       | 1.216                        |
| Montagnano, Italy (MO)                                                                   | Ideotype              | 0.0050                                                    | 1.120                       | 101.7                            | 0.336                                                        | 794.7                            | 0.065                       | 1.205                        |
| Lleida, Spain (LL)                                                                       | Ideotype              | 0.0055                                                    | 1.060                       | 106.9                            | 0.166                                                        | 830.9                            | 0.048                       | 1.673                        |
| Seville, Spain (SL)                                                                      | Ideotype              | 0.0060                                                    | 0.680                       | 89.5                             | 0.120                                                        | 731.7                            | 0.070                       | 1.014                        |
| Wheat Ideotype optimised as tolerant to heat and drought stress around flowering (iT)    |                       |                                                           |                             |                                  |                                                              |                                  |                             |                              |
| Tylstrup, Denmark (TR)                                                                   | Ideotype              | 0.0094                                                    | 1.430                       | 135.1                            | 0.101                                                        | 900.0                            | 0.037                       | 1.262                        |
| Kaunas, Lithuania (KA)                                                                   | Ideotype              | 0.0092                                                    | 0.230                       | 138.7                            | 0.152                                                        | 886.2                            | 0.058                       | 1.030                        |
| Wageningen, Netherlands (WA)                                                             | Ideotype              | 0.0072                                                    | 0.530                       | 140.0                            | 0.126                                                        | 900.0                            | 0.069                       | 1.006                        |
| Rothamsted, UK (RR)                                                                      | Ideotype              | 0.0100                                                    | 1.170                       | 140.0                            | 0.055                                                        | 900.0                            | 0.063                       | 1.000                        |
| Halle Germany (HA)                                                                       | Ideotype              | 0.0070                                                    | 1.310                       | 140.0                            | 0.050                                                        | 898.2                            | 0.058                       | 1.188                        |
| Vienna, Austria (VI)                                                                     | Ideotype              | 0.0086                                                    | 0.260                       | 139.5                            | 0.073                                                        | 900.0                            | 0.061                       | 1.000                        |
| Debrecen, Hungary (DC)                                                                   | Ideotype              | 0.0100                                                    | 0.960                       | 140.0                            | 0.094                                                        | 899.7                            | 0.035                       | 1.000                        |
| Clermont-Ferrand, France (CF)                                                            | Ideotype              | 0.0100                                                    | 1.070                       | 140.0                            | 0.064                                                        | 899.9                            | 0.046                       | 1.170                        |
| Sremska, Serbia (SR)                                                                     | Ideotype              | 0.0094                                                    | 0.950                       | 138.8                            | 0.050                                                        | 900.0                            | 0.026                       | 1.047                        |
| Toulouse, France (TU)                                                                    | Ideotype              | 0.0094                                                    | 0.950                       | 131.0                            | 0.050                                                        | 899.8                            | 0.070                       | 1.216                        |
| Montagnano, Italy (MO)                                                                   | Ideotype              | 0.0082                                                    | 1.200                       | 131.2                            | 0.072                                                        | 900.0                            | 0.030                       | 1.000                        |
| Lleida, Spain (LL)                                                                       | Ideotype              | 0.0095                                                    | 0.450                       | 119.3                            | 0.050                                                        | 900.0                            | 0.027                       | 1.000                        |
| Seville, Spain (SL)                                                                      | Ideotype              | 0.0099                                                    | 1.020                       | 126.3                            | 0.050                                                        | 900.0                            | 0.021                       | 1.002                        |

*A* : Maximum area of flag leaf  
*S<sub>G</sub>* : Stay green  
*P<sub>h</sub>* : Phyllochron  
*P<sub>p</sub>* : Day length response  
*G<sub>f</sub>* : Duration of grain filling  
*R<sub>u</sub>* : Rate coefficient of root water uptake from the root bottom  
*W<sub>ss</sub>* : Maximum leaf senescence acceleration factor due to water stress
